# Supplementary material for: Effect of zwitterionic sulfobetaine incorporation on blood behaviours, phagocytosis, and in vivo biodistribution of pH-responsive micelles with positive charges
Source: Royal Society of Chemistry journal article supplement (doi:10.1039/d3tb02477f), 2024-01-01
Supplement: d3tb02477f1.pdf [file d3tb02477f1.pdf]

## Supporting Information

### Effect of zwitterionic sulfobetaine incorporation on blood behaviours, phagocytosis, and in vivo biodistribution of pH-responsive micelles with positive charges

Chengwei Wang<sup>a#</sup>, Hao Liu<sup>b#</sup>, Hu Lin<sup>c</sup>, Rui Zhong<sup>d</sup>, Hao Li<sup>b</sup>, Jiaxin Liu<sup>d</sup>, Xianglin Luo<sup>c</sup>,  
Meng Tian<sup>b\*</sup>

<sup>a</sup>Division of Internal Medicine, Institute of Integrated Traditional Chinese and Western Medicine, West China Hospital, Sichuan University, Chengdu, 610041, PR China

<sup>b</sup>Department of Neurosurgery and Neurosurgery Research Laboratory, West China Hospital, Sichuan University, Chengdu, 610041, PR China

<sup>c</sup>College of Polymer Science and Engineering, State Key Laboratory of Polymer Materials Engineering, Sichuan University, Chengdu 610065, PR China

<sup>d</sup>Institute of Blood Transfusion, Chinese Academy of Medical Sciences & Peking Union Medical College, Chengdu, 610052, PR China

#These authors contributed to this work equally.

#### Corresponding Author:

Meng Tian

No.37 Guoxue Alley, Wuhou District, Chengdu, Sichuan Province, China 610041, Tel:

+86 28 85164168, Fax: +86 28 85164168, Email: tianmeng@scu.edu.cn.

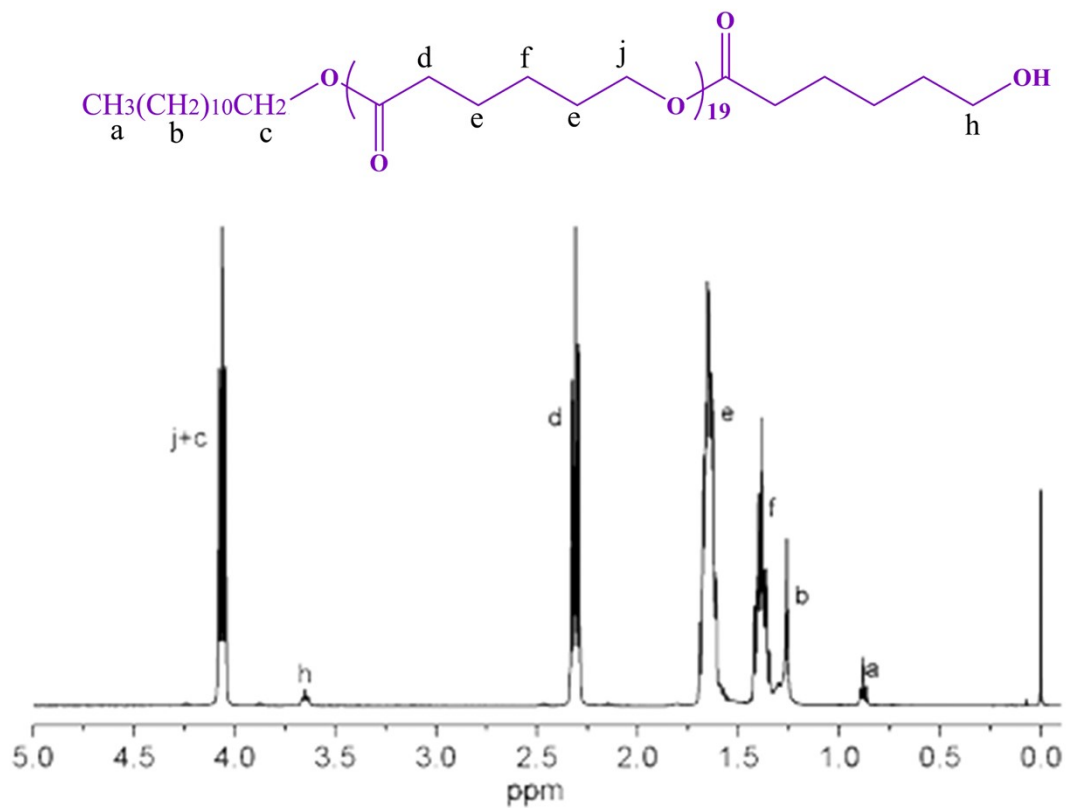

Figure S1. The <sup>1</sup>H-NMR spectrum of the PCL<sub>20</sub>

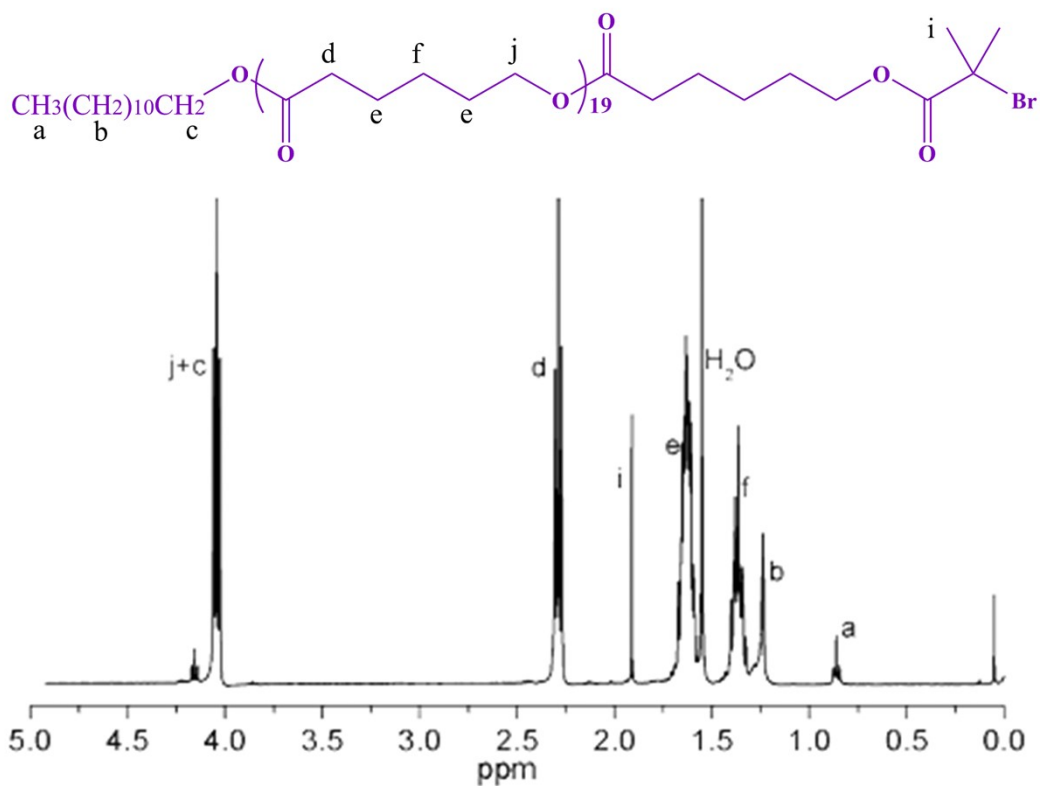

Figure S2. The <sup>1</sup>H-NMR spectrum of the PCL<sub>20</sub>-Br

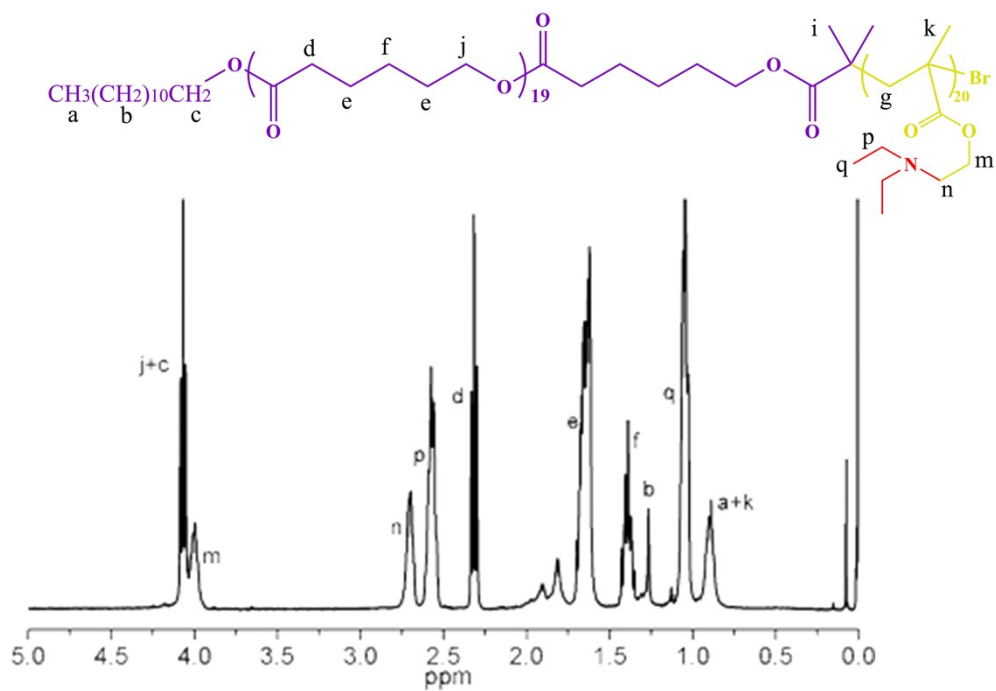

Figure S3. The <sup>1</sup>H-NMR spectrum of PCL<sub>20</sub>-PDEA<sub>20</sub>

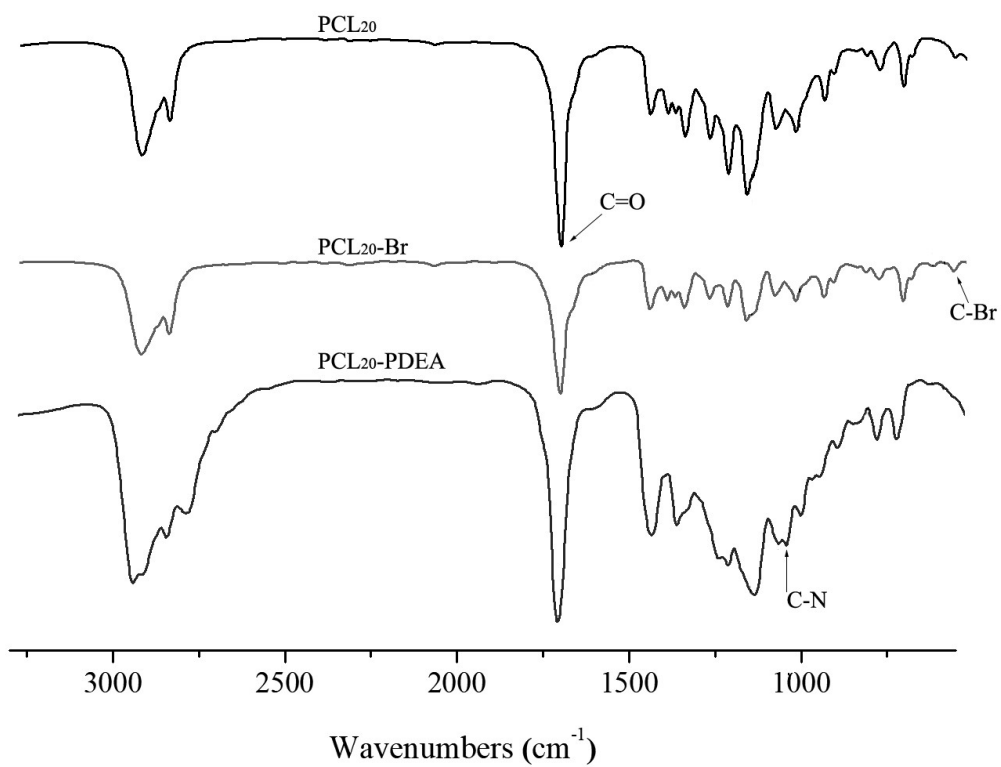

Figure S4. The FTIR spectra of the PCL<sub>20</sub>, PCL<sub>20</sub>-Br, and PCL<sub>20</sub>-PDEA<sub>20</sub>
